# Supplementary material for: Degradation of benzylamines during chlorination and chloramination
Source: Royal Society of Chemistry journal article supplement (doi:10.1039/d4ew00556b), 2024-01-01
Supplement: d4ew00556b1.xlsx [file d4ew00556b1.xlsx]

## Sheet: Benzylamine Results
	Results represent average and standard deviations of experimental triplicates in uM concentrations
	chlorine
			benzaldehyde		benzonitrile		benzylamine		mass balance		chlorine resid (uM)
	hours		avg	stdev	avg	stdev	avg	stdev	avg	stdev	avg	stdev
	0		0		0		254.381	20.6668	254.381	20.6668	1141.52	71.6118
	4		42.2683	15.0829	16.7915	3.54844	209.385	4.56196	268.445	16.1523	915.828	51.6465
	8		34.582	14.8683	65.4941	8.64013	157.033	5.78415	257.109	18.1431	NM	NM
	24		223.079	21.5961	19.6652	6.92705	22.9167	0.502475	265.661	22.6854	713.391	9.0626
	chloramines		benzaldehyde		benzonitrile		benzylamine		mass balance		chlorine resid (uM)
	days		avg	stdev	avg	stdev	avg	stdev	avg	stdev	avg	stdev
	0		0		0		254.381	20.6668	254.381	20.6668	1141.52	71.6118
	1		15.8133	1.58704	0		254.723	2.96331	270.536	3.36154	829.756	38.406
	2		19.5047	1.79072	9.94762	2.92814	214.689	8.96861	244.141	9.60295	691.706	33.1319
	3		26.1106	4.37947	15.2579	0.980285	177.05	6.73135	218.418	8.09023	559.803	46.1467
	4		97.69	11.2285	6.37505	3.16674	151.216	7.47906	255.281	13.858	498.882	43.8577

## Sheet: N-methylbenzylamine Results
	Results represent average and standard deviations of experimental triplicates in uM concentrations
	chlorine
	Time	benzylamine		N-methylbenzylamine		benzaldehyde		Mass balance		Chlorine residual		formaldehyde		monomethylamine
	hours	avg	stdev	avg	stdev	avg	stdev	avg	stdev	avg	stdev	avg	stdev	avg	stdev
	0			250				250
	6.5	0.406508	0.0510625	246.094	18.2292	8.62288	0.162941	255.123	18.23	1050.86	83.7158	NM		NM
	24	0	0.0197392	277.509	5.58906	18.2827	1.09748	295.792	5.6958	992.511	22.6087	NM		NM
	48	0	0.0367611	220.501	7.45208	29.3115	1.34168	249.813	7.5719	877.375	35.0132	59.2371	7.12899	54.7321	0.480101
	72	0	0.0302876	190.384	5.58906	31.6379	2.24449	222.022	6.0229	734.406	28.6755	NM		NM
	96	0	0.023216	164.569	11.6346	40.2041	0.95917	204.773	11.674	601.721	16.0628	NM		NM
	168	0	0.0219274	126.923	11.3323	50.7144	3.94171	177.637	11.9983	374.469	46.5688	NM		NM
	chloramines
	Time	benzylamine		N-methylbenzylamine		benzaldehyde		Mass balance		Chlorine residual		formaldehyde		monomethylamine
	hours	avg	stdev	avg	stdev	avg	stdev	avg	stdev	avg	stdev	avg	stdev	avg	stdev
	0	0		250		0		250
	6.5	1.29207	0.0821601	258.247	55.6911	7.1004	3.91214	266.639	55.8284	1097.14	5.96437	NM		NM
	24	3.29574	0.0288699	273.206	8.12072	12.0234	1.15424	288.526	8.20239	952.381	57.0077	NM		NM
	48	5.26341	0.0606116	245.24	3.22685	21.2128	1.716	271.717	3.65525	719.428	47.4349	37.102	2.43005	24.0647	1.16289
	72	6.26234	0.129978	186.082	9.31511	24.6555	2.51074	216.999	9.64841	637.156	18.1366	NM		NM
	96	4.67193	0.24278	166.72	18.3486	32.752	1.02989	204.144	18.3791	542.142	51.5869	NM		NM
	168	4.76758	0.144335	151.662	0	34.6466	1.33816	191.076	1.34592	307.512	12.1699	NM		NM

## Sheet: N,N-dimethylbenzylamine results
	Results represent average and standard deviations of experimental triplicates in uM concentrations
	chlorine
	chlorine
	Time	benzylamine		N-methylbenzylamine		N,N-dimethylbenzylamine		benzaldehyde		Mass balance		Chlorine residual		Formaldehyde		Dimethylamine
	hours	avg	stdev	avg	stdev	avg	stdev	avg	stdev	avg	stdev	avg	stdev	avg	stdev	avg	stdev
	0	0		0		250		0		250		NM		NM		NM
	0.0833333	0		164.374	2.79525	37.4225	5.09364	41.8201	4.49762	243.617	7.3476	NM		NM		NM
	1	0		164.742	7.21446	0		42.2142	2.63386	206.956	7.68021	508.384	22.1125	142.826	3.07581	68.7935	10.6844
	6	0		154.561	4.59634	0		44.1725	3.69491	198.733	5.89735	397.496	25.7525	NM		NM
	chloramines
	hours	benzylamine		N-methylbenzylamine		N,N-dimethylbenzylamine		benzaldehyde		Mass balance		Chlorine residual		Formaldehyde		Dimethylamine		NDMA
	Time	avg	stdev	avg	stdev	avg	stdev	avg	stdev	avg	stdev	avg	stdev	avg	stdev	avg	stdev	avg	stdev
	0	0		0		250		0		250								0
	6	0		50.6616	1.81531	157.6	3.40666	29.9713	2.22333	238.233	4.45465	167.449	5.77275	61.0113	6.7498	NM		114.946	25.1194
	24	0		60.5976	4.85892	95.3032	4.81603	35.698	3.11744	191.599	7.51809	126.425	15.4149	55.5119	3.85998	NM		135.039	7.0952
	48	0		58.267	3.93492	62.9655	9.92453	37.0452	3.64111	158.278	11.28	93.1142	26.4951	57.8629	2.61756	33.996	1.22287	86.0539	3.72053

## Sheet: RO experiments
		Data represent average and range of duplicates from authentic fully nitrified effluent
			NDMA (ng/L)
			average	range
		Background	11.7004	0.12494
	Free chlorine for 5 min then ammonia	RO feed water	2148.62	42.3381
		RO permeate in dark	2304.14	53.5105
		RO permeate with 860 mJ/cm2 UV	118.572	13.5316
	Ammonia first, then chlorine	RO feed water	12284.3	519.073
		RO permeate in dark	10178.9	418.731
		RO permeate with 860 mJ/cm2 UV	1162.81	58.7949
